# Supplementary material for: Influence of substitution pattern and enhanced π-conjugation on a family of thiophene functionalized 1,5-dithia-2,4,6,8-tetrazocines
Source: Royal Society of Chemistry journal article supplement (doi:10.1039/c5nj01345c), 2015-01-01
Supplement: c5nj01345c1.pdf [file c5nj01345c1.pdf]

## Electronic Supporting Information

Influence of substitution pattern and enhanced  $\pi$ -conjugation on a family of thiophene functionalized 1,5-dithia-2,4,6,8-tetrazocines

*François Magnan,<sup>a,b</sup> Ilia Korobkov<sup>a</sup> and Jaclyn L. Brusso<sup>\*a,b</sup>*

<sup>a</sup>Department of Chemistry and <sup>b</sup>Centre for Catalysis Research and Innovation, University of Ottawa, Ottawa, Ontario K1N 6N5, Canada.

\*corresponding author: [jbrusso@uottawa.ca](mailto:jbrusso@uottawa.ca)

NEW JOURNAL OF CHEMISTRY

### Contents (11 pages)

|          |                                            |
|----------|--------------------------------------------|
| Page S2  | Comparative optical and theoretical data   |
| Page S3  | TD DFT vertical excitation energies        |
| Page S5  | Diffuse reflectance measurements           |
| Page S6  | Molecular orbitals                         |
| Page S7  | Energy levels diagram                      |
| Page S8  | Fluorescence measurement                   |
| Page S9  | Optimized geometries and XRD measurements, |
| Page S10 | DFT calculations archival files            |

**Table S1** – Molar coefficients of extinction of **1c**, **2a** and **2b** in DCM.

| <b>1c</b>      |                                | <b>2a</b>      |                                | <b>2b</b>      |                                |
|----------------|--------------------------------|----------------|--------------------------------|----------------|--------------------------------|
| $\lambda$ (nm) | $\epsilon$ ( $M^{-1}cm^{-1}$ ) | $\lambda$ (nm) | $\epsilon$ ( $M^{-1}cm^{-1}$ ) | $\lambda$ (nm) | $\epsilon$ ( $M^{-1}cm^{-1}$ ) |
| 269            | 15230                          | 256            | 14401                          | 259            | 16501                          |
| 343            | 39396                          | 299            | 11880                          | 304            | 12527                          |
| 360            | 33231                          | 395            | 59436                          | 404            | 66223                          |
| 458            | 4563                           | 477            | 3056                           | 485            | 2944                           |

**Table S2** – Comparative table for the measured molar coefficients of extinction<sup>a</sup> with the corresponding calculated oscillator strengths.<sup>b</sup>

|           | $\lambda$<br>(nm) | $\epsilon$<br>( $M^{-1}cm^{-1}$ ) | Calculated $\lambda$<br>(nm) | $f$    |
|-----------|-------------------|-----------------------------------|------------------------------|--------|
| <b>1c</b> | 343               | 39396                             | 346                          | 1.0581 |
|           | 458               | 4563                              | 516                          | 0.0382 |
| <b>2a</b> | 395               | 59436                             | 415                          | 1.5882 |
|           | 477               | 3056                              | 594                          | 0.0175 |
| <b>2b</b> | 404               | 66223                             | 426                          | 1.6323 |
|           | 485               | 2944                              | 624                          | 0.0139 |

<sup>a</sup> Optical measurements were performed on dilute DCM solutions. <sup>b</sup> TD DFT/B3LYP/6-311+G(d,p) level of theory on geometry optimized structures (where R = Me for **1c** and **2b**) where  $k$  = order of excitation energy and  $f$  = oscillator strength.

**Table S3** – TD DFT optical transitions<sup>a</sup> for **1c**, **2a** and **2b**.

| <i>k</i> | <b>1c</b> |          | <b>2a</b> |          | <b>2b</b> |          |
|----------|-----------|----------|-----------|----------|-----------|----------|
|          | E (eV)    | <i>f</i> | E (eV)    | <i>f</i> | E (eV)    | <i>f</i> |
| 1        | 2.4026    | 0.0382   | 2.0858    | 0.0175   | 1.9857    | 0.0139   |
| 2        | 2.8539    | 0.0011   | 2.3665    | 0.0041   | 2.2337    | 0.0047   |
| 3        | 3.1997    | 0.0000   | 2.9835    | 1.5882   | 2.9068    | 1.6323   |
| 4        | 3.2019    | 0.0037   | 3.2132    | 0.0006   | 3.2088    | 0.0013   |
| 5        | 3.2408    | 0.0026   | 3.4519    | 0.0199   | 3.3413    | 0.0606   |
| 6        | 3.5839    | 1.0581   | 3.4649    | 0.0852   | 3.4151    | 0.0664   |
| 7        | 4.0145    | 0.0000   | 3.4961    | 0.0403   | 3.4466    | 0.0767   |
| 8        | 4.2491    | 0.0137   | 3.5875    | 0.0751   | 3.4810    | 0.0130   |
| 9        | 4.3360    | 0.0102   | 3.6050    | 0.0802   | 3.5372    | 0.1052   |
| 10       | 4.4070    | 0.1824   | 3.6877    | 0.0034   | 3.6214    | 0.0067   |
| 11       | 4.4152    | 0.1217   | 3.6896    | 0.0009   | 3.6300    | 0.0000   |
| 12       | 4.4734    | 0.0246   | 3.9833    | 0.0003   | 3.8247    | 0.0002   |
| 13       | 4.5689    | 0.0901   | 3.9870    | 0.2722   | 3.8710    | 0.2592   |
| 14       | 4.6559    | 0.0075   | 4.0327    | 0.0000   | 4.0307    | 0.0000   |
| 15       | 4.7257    | 0.0000   | 4.2650    | 0.0059   | 4.1824    | 0.0284   |
| 16       | 5.0160    | 0.0142   | 4.3402    | 0.0025   | 4.2953    | 0.0013   |
| 17       | 5.1285    | 0.0472   | 4.3488    | 0.0114   | 4.3442    | 0.0104   |
| 18       | 5.3278    | 0.0000   | 4.4521    | 0.0057   | 4.4141    | 0.0015   |
| 19       | 5.3768    | 0.0000   | 4.4701    | 0.0823   | 4.4430    | 0.0607   |
| 20       | 5.4301    | 0.0681   | 4.5227    | 0.0001   | 4.4589    | 0.0048   |

<sup>a</sup> TDDFT/B3LYP/6-311+G(d,p) level of theory on geometry optimized structures (where R = Me for **1c** and **2b**) where *k* = order of excitation energy and *f* = oscillator strength.

**Table S4** – Selected TD DFT transitions for **1c**, **2a** and **2b** (DCM solvent cavity; where R = Me for **1c** and **2b**)

| Compound                    | Calculated $\lambda$<br>(nm) | Transition                  | Oscillator strength<br>( $f$ ) |
|-----------------------------|------------------------------|-----------------------------|--------------------------------|
| <b>1c</b>                   | 346                          | HOMO $\rightarrow$ LUMO+1   | 1.0581                         |
|                             | 281                          | HOMO-6 $\rightarrow$ LUMO   | 0.1824                         |
|                             |                              | HOMO-5 $\rightarrow$ LUMO+1 |                                |
|                             |                              | HOMO-2 $\rightarrow$ LUMO+1 |                                |
|                             | 281                          | HOMO-6 $\rightarrow$ LUMO+1 | 0.1217                         |
|                             |                              | HOMO-5 $\rightarrow$ LUMO   |                                |
|                             | 271                          | HOMO-6 $\rightarrow$ LUMO   | 0.0901                         |
| HOMO-3 $\rightarrow$ LUMO+1 |                              |                             |                                |
| HOMO-2 $\rightarrow$ LUMO+1 |                              |                             |                                |
| HOMO $\rightarrow$ LUMO+2   |                              |                             |                                |
| <b>2a</b>                   | 416                          | HOMO $\rightarrow$ LUMO+1   | 1.5882                         |
|                             | 358                          | HOMO-5 $\rightarrow$ LUMO   | 0.0852                         |
|                             |                              | HOMO-3 $\rightarrow$ LUMO   |                                |
|                             | 311                          | HOMO-9 $\rightarrow$ LUMO   | 0.2722                         |
|                             |                              | HOMO-1 $\rightarrow$ LUMO+2 |                                |
|                             | 277                          | HOMO-9 $\rightarrow$ LUMO   | 0.0823                         |
|                             |                              | HOMO-6 $\rightarrow$ LUMO+1 |                                |
| HOMO-4 $\rightarrow$ LUMO+1 |                              |                             |                                |
| HOMO-3 $\rightarrow$ LUMO+2 |                              |                             |                                |
| <b>2b</b>                   | 426                          | HOMO $\rightarrow$ LUMO+1   | 1.6323                         |
|                             | 360                          | HOMO-5 $\rightarrow$ LUMO   | 0.0767                         |
|                             |                              | HOMO-3 $\rightarrow$ LUMO   |                                |
|                             | 350                          | HOMO-6 $\rightarrow$ LUMO   | 0.1052                         |
|                             |                              | HOMO-4 $\rightarrow$ LUMO   |                                |
| 320                         | HOMO $\rightarrow$ LUMO+2    | 0.2592                      |                                |
|                             | 320                          | HOMO-1 $\rightarrow$ LUMO+2 | 0.2592                         |

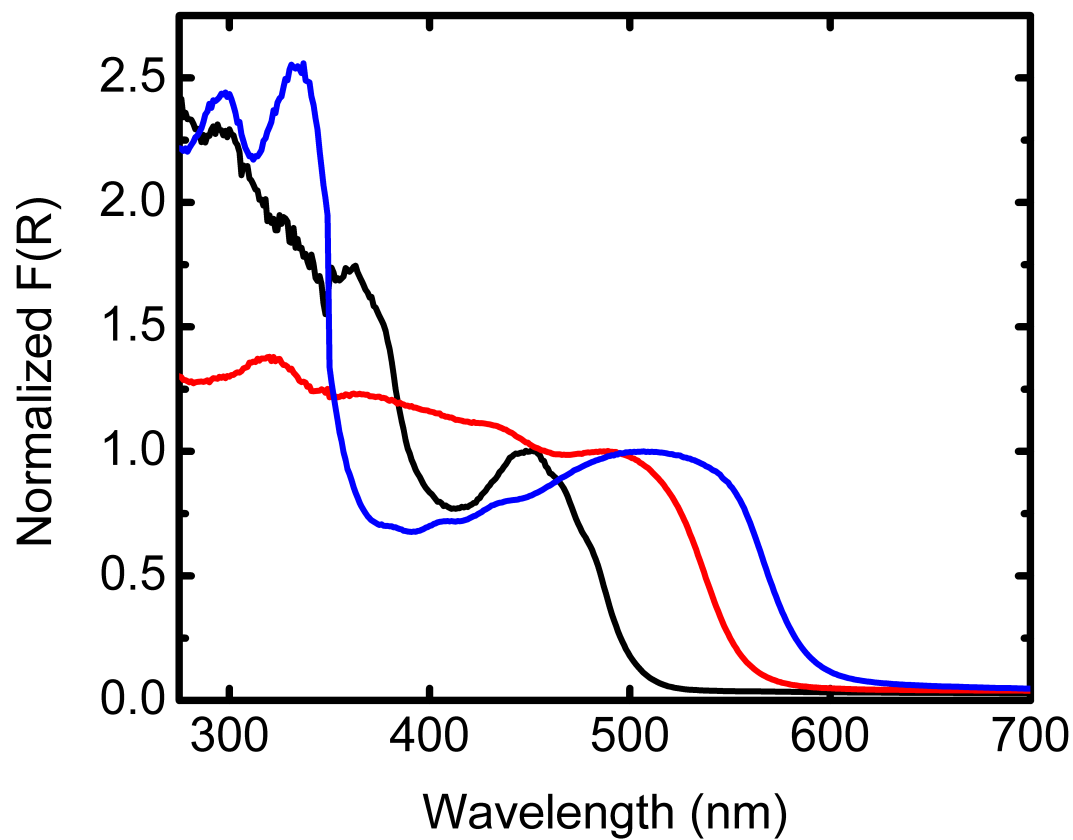

**Figure S1** – Solid-state diffuse reflectance measurements of **1c** (black), **2a** (red) and **2b** (blue). Results are presented in Kubelka-Munk units ( $F(R)$ ) so as to directly compare with solution absorption measurements.

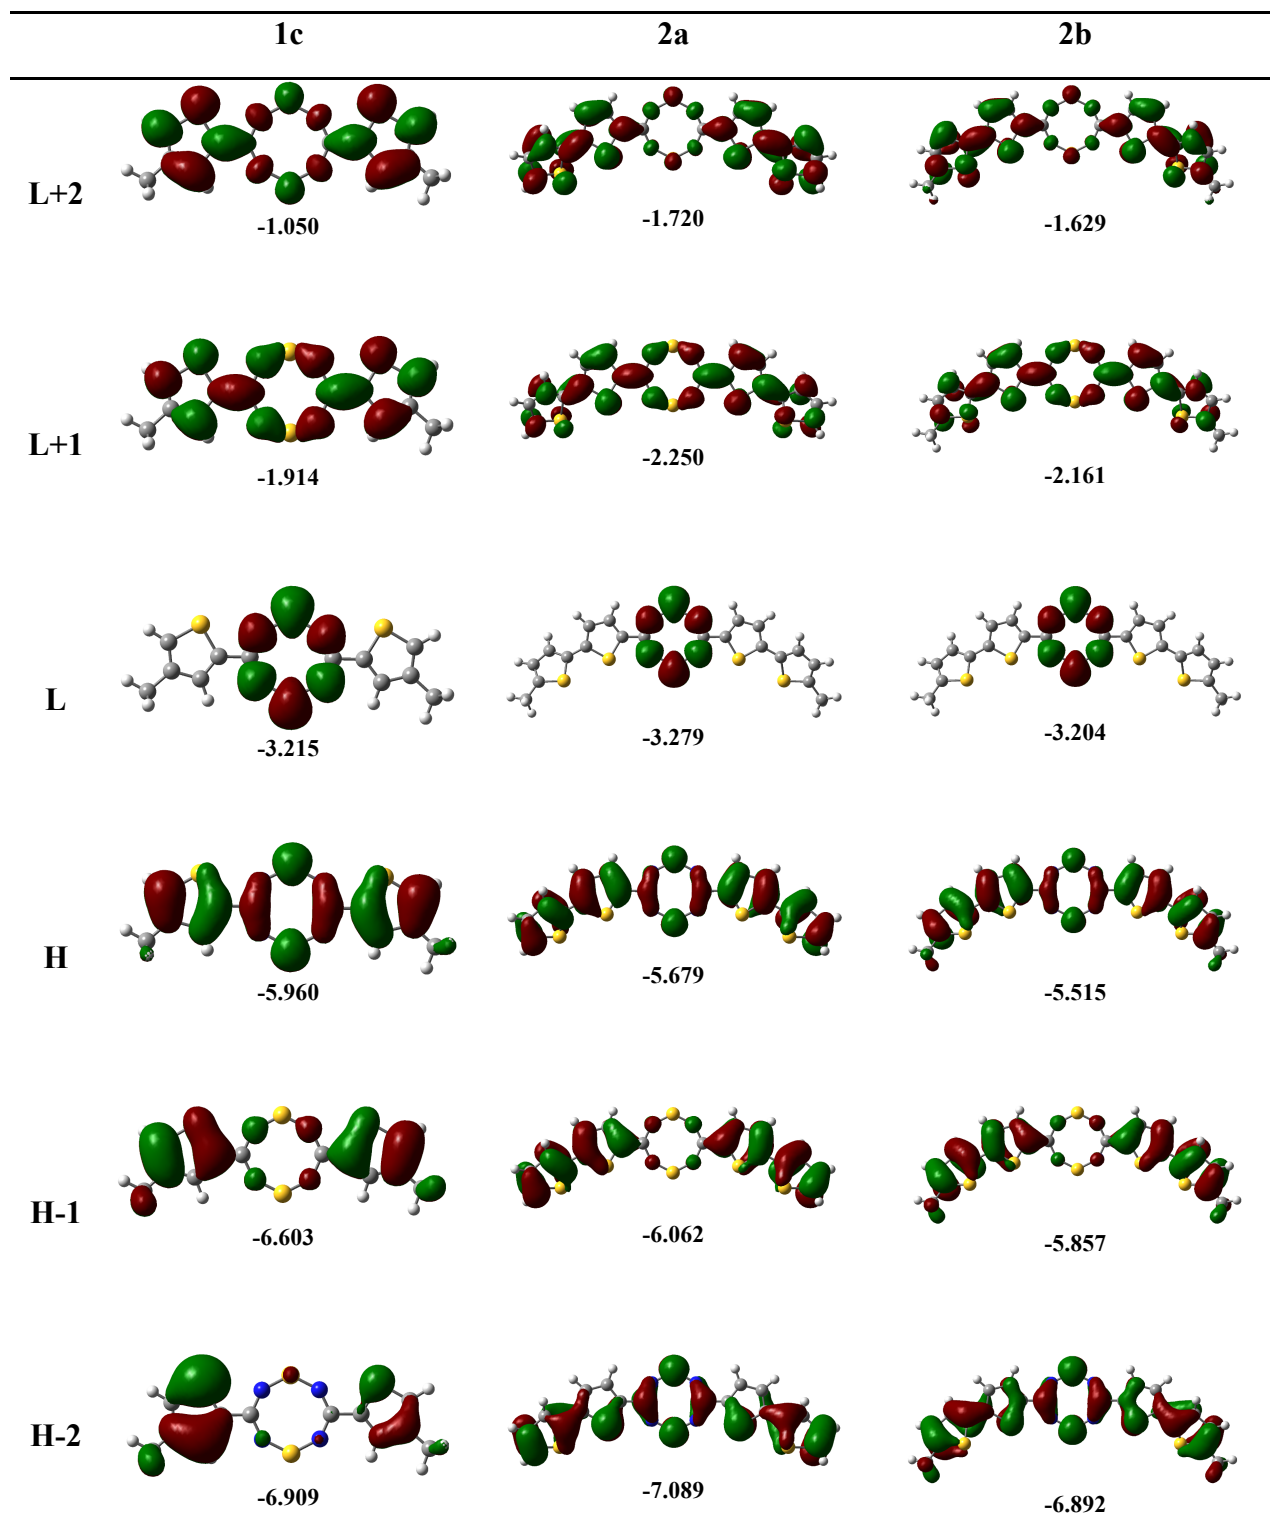

Figure S2 – Frontier molecular orbitals and corresponding energies (in eV) for 1c, 2a and 2b.

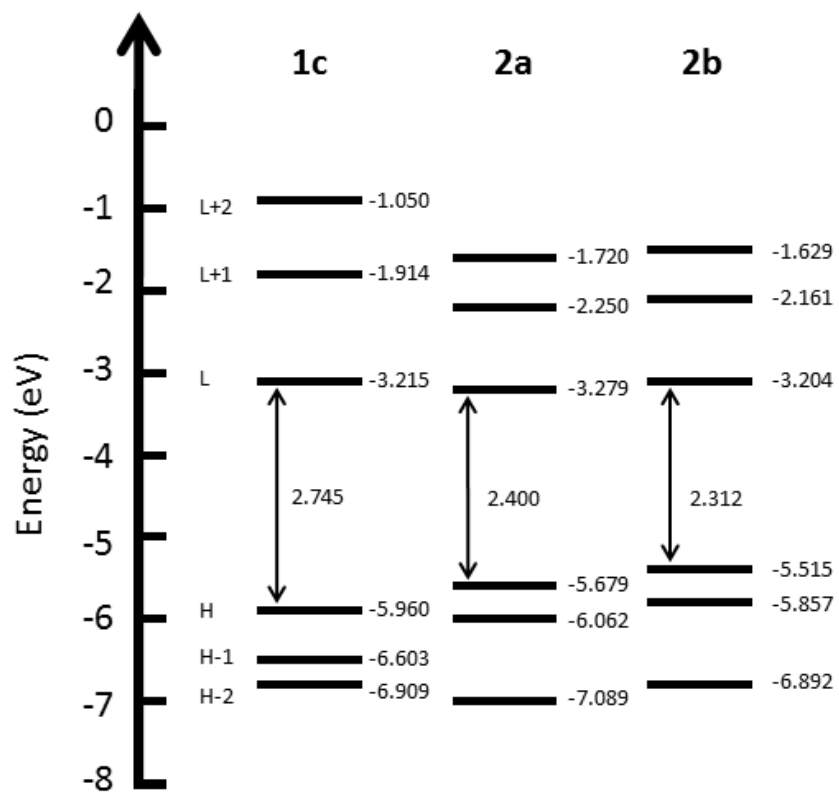

**Figure S3** – Energy level diagram for the frontier orbitals of **1c**, **2a** and **2b**.

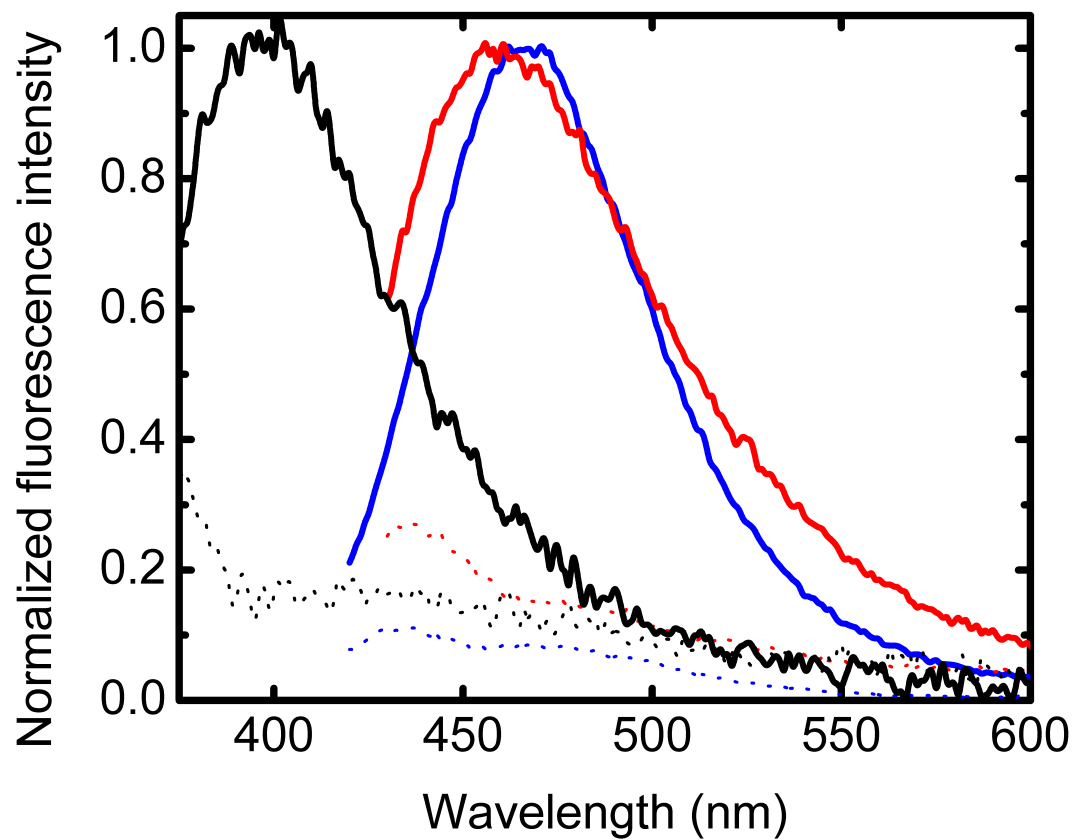

**Figure S4** – Normalized fluorescence spectra for **1c** (black), **2a** (red) and **2b** (blue) (solid lines) and the corresponding blanks taken in the same conditions (dotted lines)



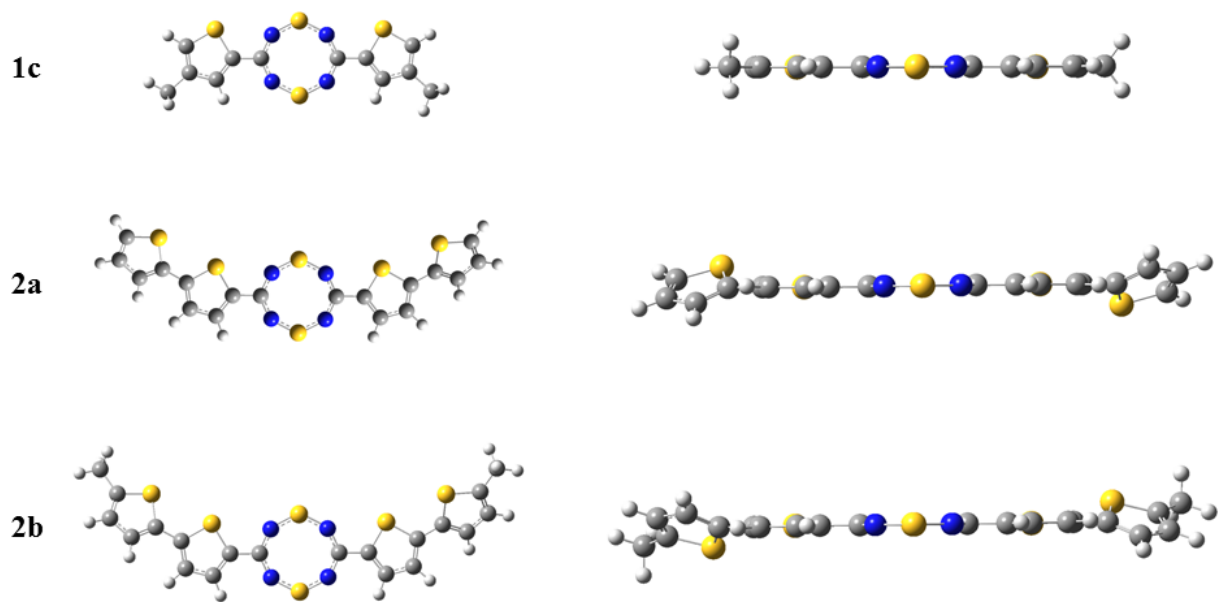

**Figure S5.** Top view (left) and side view (right) of geometry optimized structures of **1c** (top), **2a** (middle) and **2b** (bottom), where R = Me for **1c** and **2b**.

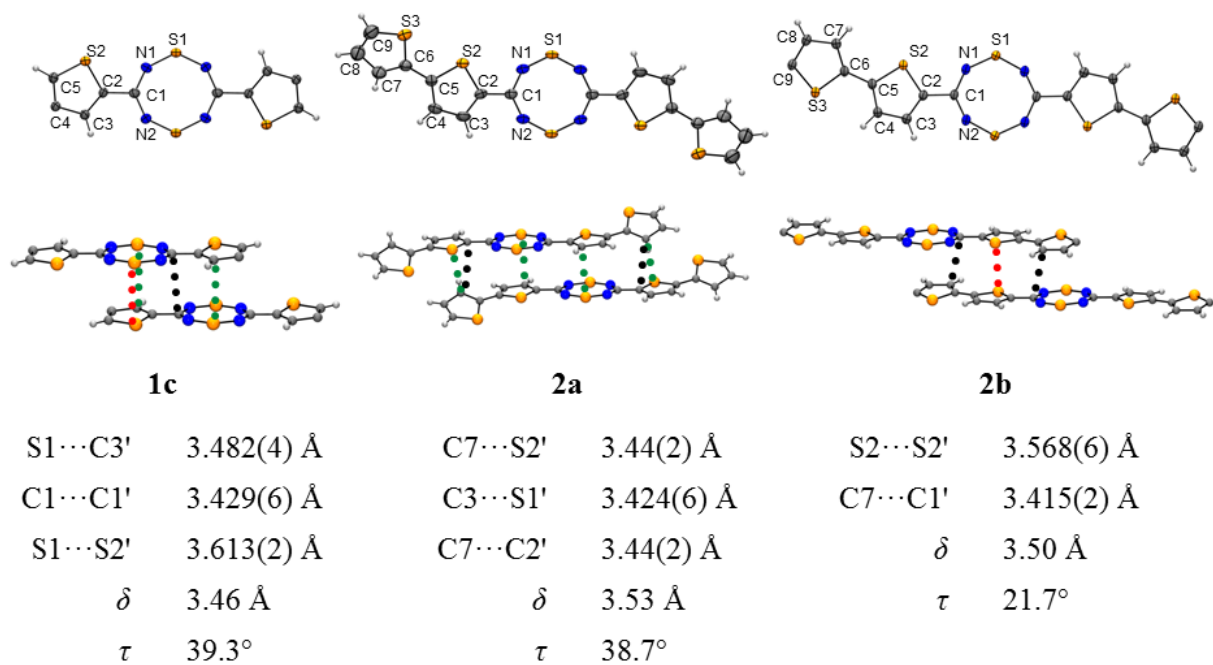

**Figure S6.** Crystal structures of **1c**, **2a** and **2b** showing atom numbering and close intermolecular contacts along the  $\pi$ -stack. Hexyl chains are omitted for **1c** and **2b** for clarity. S...S' contacts are shown in red; S...C' contacts are shown in green; C...C' contacts are shown in black.

## Density Functional Theory Calculations and Archival Files

Molecular geometry optimizations were performed on **1c**, **2a** and **2b** (where R = Me for **1c** and **2b**) at the DFT (B3LYP) level of theory with the 6-311+G(d,p) basis set, using the Gaussian 09W program package.<sup>8</sup> All geometries were fully optimized without symmetry constraints.

Archive file (geometry optimization) for **1c** (where R = Me):

```
#N B3LYP/6-311+G(d,p) OPT(EstmFC)\b(4HT)8MR\0,1\C,-0.6459505318,0
.,0.0164419628\C,-0.2990870749,0.,1.4836497848\C,1.0334515155,0.,1.988
6624869\C,1.1080436232,0.,3.3599524294\S,-0.4835333376,0.,4.069180112\C,
-1.2177595319,0.,2.5034476872\H,-2.2952939415,0.,2.4232700826\C,2.31
39013938,0.,4.2073368071\N,2.0823006634,0.,5.515838006\S,2.8172624751,
0.,6.9229148413\N,4.3893744327,0.,7.1474337807\C,5.5419644649,0.,6.486
3399606\N,5.7766155424,0.,5.1782200627\S,5.036055932,0.,3.7750851857\N
,3.4657984886,0.,3.5440343624\C,6.7484420126,0.,7.3340785606\C,8.06165
14906,0.,6.9380198649\C,8.98937799,0.,8.0227489145\C,8.3431702724,0.,9
.2311869814\S,6.6184478274,0.,9.0737167466\H,8.7873584701,0.,10.215987
0576\C,10.4835063353,0.,7.8488206714\H,10.99354731,0.,8.8139122582\H,1
0.8167022288,-0.8816495237,7.2925960341\H,10.8167022288,0.8816495237,7
.2925960341\H,8.3480509559,0.,5.8947333578\H,1.916245314,0.,1.36356041
88\H,0.2577595437,0.,-0.5959940488\H,-1.2316117791,-0.8823218117,-0.25
68057044\H,-1.2316117791,0.8823218117,-0.2568057044
```

Archive file (geometry optimization) for **2a**:

```
#N B3LYP/6-311+G(d,p) OPT(EstmFC)\b(TT)8MR 2\0,1\C,0.0141823577,-
0.0011990064,-0.0090184814\N,0.0152200674,-0.0005650727,1.3202177112\S
,0.9889133677,0.0005195002,2.5741808247\N,2.5753079208,0.0022666236,2.
5121800258\C,3.5932376983,0.0039657492,1.6573789231\N,3.5943223141,0.0
036970215,0.3275223793\S,2.6160734337,0.0022227614,-0.9205933785\N,1.0
312204499,0.0001284554,-0.8658440402\C,4.9275714449,0.0051390368,2.278
0419458\C,6.1545415847,0.0074599575,1.6593478921\C,7.2380832193,0.0266
004609,2.5683636097\C,6.8450102599,0.0299102015,3.8900849\S,5.09988253
63,0.0048446415,4.0145688431\C,7.6974938487,0.0244720655,5.0641752681\C,
8.9546316994,-0.5224600818,5.1888562566\C,9.5307708277,-0.3313688973
,6.4742717263\C,8.7109487028,0.3525294007,7.3273722722\S,7.2199546676,
0.7923312431,6.5654448195\H,8.8880262334,0.6257827816,8.3562171903\H,1
0.5083943833,-0.6989544951,6.7568832108\H,9.434460666,-1.0695188314,4.
3882617185\H,8.2764333111,0.0650371227,2.2668530919\H,6.2586125254,0.0
111208946,0.5833882924\C,-1.3196883298,-0.002377237,-0.6306771293\C,-1
.6359736401,-0.0037231759,-1.9679150854\C,-3.0290839879,-0.0232049196,
-2.2120520761\C,-3.7875825408,-0.0277540922,-1.0604773593\S,-2.7595620
519,-0.0034442597,0.3552125454\C,-5.2348371231,-0.0229643304,-0.957144
0372\C,-6.1396584069,0.524334603,-1.8385282494\C,-7.4941575567,0.33237
88018,-1.4522242709\C,-7.6190671725,-0.3525064651,-0.2762415975\S,-6.0
7607634,-0.7922262236,0.3740262838\H,-8.5203143178,-0.6265394792,0.250
261307\H,-8.3398561123,0.7000818662,-2.0181965283\H,-5.8360334582,1.07
22296687,-2.72061867\H,-3.4666844457,-0.0609997322,-3.200805911\H,-0.8
795302994,-0.0064589964,-2.7401321091
```

Archive file (geometry optimization) for **2b** (where R = Me):

```
#N B3LYP/6-311+G(d,p) OPT(EstmFC) \\b(HTT) 8MR\\0,1\C,-0.2713123797,0
.5773402597,-0.0695116332\C,-0.0747331733,0.2044959106,1.3678294552\C,
0.9475401288,-0.5088906054,1.9324954262\C,0.813850601,-0.6956877982,3.
336040934\C,-0.3155939211,-0.1157327521,3.8617340296\S,-1.2285171814,0
.6789725085,2.5897473827\C,-0.7441763803,-0.0956686182,5.2465742674\C,
0.0514933564,-0.1454013257,6.3723665436\C,-0.6824168213,-0.1374502328,
7.5812393227\C,-2.0418138391,-0.0715311293,7.3909212815\S,-2.436169047
5,-0.040171314,5.6908955984\C,-3.1038296175,-0.0271740239,8.4081299867
\N,-4.3415305008,0.0389394525,7.9276995251\S,-5.8614454229,0.111087737
6,8.3812535428\N,-6.3797031576,0.1219453807,9.8821064693\C,-5.95352648
85,0.0869040464,11.140783285\N,-4.7158146026,0.0203227012,11.623369810
5\S,-3.1997766169,-0.0499071588,11.1635386993\N,-2.6754356206,-0.06084
82979,9.6669360231\C,-7.0141508408,0.1300617127,12.1595050703\C,-6.882
9191633,0.1052898967,13.5272373594\C,-8.1217478614,0.1424806848,14.208
3994445\C,-9.2108769807,0.2065504535,13.364206333\S,-8.6933628058,0.22
32952911,11.6923370457\C,-10.6105161099,0.2843562887,13.7341745104\C,-
11.1534291543,0.8281242348,14.8734278424\C,-12.5699971702,0.7179857758
,14.936042261\C,-13.127098221,0.1001753342,13.8494307663\S,-11.8825791
279,-0.3786349134,12.7216902635\C,-14.5728526306,-0.1740107326,13.5698
113514\H,-15.1827089281,0.190003692,14.3991939465\H,-14.9129357951,0.3
260134713,12.6577651825\H,-14.7700458799,-1.2439139002,13.4523490491\H
,-13.1639297284,1.0981773274,15.7580665175\H,-10.5538764031,1.31786271
85,15.6294269339\H,-8.2183573263,0.0961678909,15.2849929334\H,-5.91927
95347,0.0454664097,14.0134686685\H,-0.2382294048,-0.1623714673,8.56646
70464\H,1.1322485155,-0.1593000219,6.3243598955\H,1.5119059813,-1.2637
337061,3.9367770807\H,1.7724424848,-0.9036658311,1.3522303766\H,0.5623
609921,0.198649493,-0.6643936387\H,-1.1945724903,0.1543097626,-0.47711
46697\H,-0.3166885714,1.6619379563,-0.2072440542
```
